# Supplementary material for: Enhanced sodium ion storage in MnO2 through asymmetric orbital hybridization induced by spin-paired ion doping
Source: Royal Society of Chemistry journal article supplement (doi:10.1039/d3ta06776a), 2023-12-28
Supplement: d3ta06776a1.pdf [file d3ta06776a1.pdf]

Supporting information

**Enhanced Sodium Ion Storage in MnO<sub>2</sub> through Asymmetric Orbital Hybridizations Induced  
by Spin-Paired Ion Doping**

Jinrui Wang<sup>a,1</sup>, Xia Liu<sup>a,1</sup>, Zishan Hou<sup>a</sup>, Shiyu Wang<sup>a</sup>, Shuyun Yao<sup>a</sup>, Xueying Gao<sup>a</sup>, Yuanming Liu<sup>a</sup>, Kaiqi Nie<sup>c</sup>,  
Jiangzhou Xie<sup>b,\*</sup>, Zhiyu Yang<sup>a,\*</sup>, Yi-Ming Yan<sup>a,\*</sup>

<sup>1</sup> These authors contributed equally to this work.

<sup>a</sup> State Key Laboratory of Organic-Inorganic Composites, Beijing Advanced Innovation Center for Soft Matter  
Science and Engineering, Beijing University of Chemical Technology, Beijing, 100029, People's Republic of China

<sup>b</sup> School of Mechanical and Manufacturing Engineering, University of New South Wales, Sydney, New South  
Wales 2052, Australia

<sup>c</sup> Institute of High Energy Physics, Chinese Academy of Sciences, Beijing 100049, People's Republic of China

Corresponding authors.

E-mail: [yanym22@mail.buct.edu.cn](mailto:yanym22@mail.buct.edu.cn);

[\\_yangzhiyu@mail.buct.edu.cn](mailto:_yangzhiyu@mail.buct.edu.cn);

[jiangzhou.xie@unsw.edu.au](mailto:jiangzhou.xie@unsw.edu.au)

## **Experimental Procedures**

### **Chemicals and reagents**

Mn(NO<sub>3</sub>)<sub>2</sub> and Tetramethylammonium hydroxide (TMA·OH) were obtained from Shanghai Macklin Biochemical Co., Ltd. SnCl<sub>4</sub>·5H<sub>2</sub>O was obtained from Innochem. H<sub>2</sub>O<sub>2</sub> was purchased from Beijing Chemical Works. Anhydrous (Na<sub>2</sub>SO<sub>4</sub>) was purchased from Beijing Tong Guang Fine Chemicals Company. All reagents were used as received without further purification. And all solutions were prepared using ultrapure water (resistance = 18.2 MΩ cm).

### **Characterization of the sample**

Microstructure were studied using scanning electron microscopy (SEM, FEI Quanta 200) at 20 kV, transmission electron microscopy (TEM; FEI Tecnai G2 20) and HRTEM (JEOL, JEM-2100, 200 kV). The electronic structure and compositional information on the samples were investigated by X-ray photoelectron spectroscopy (XPS, ESCALAB 250). The band gap of the materials were determined by UV-vis adsorption spectroscopy (Varian Cary 6000i) in the wavelength range of 250-800nm. JEOLJESFA200 EPR spectrometer was used to obtain the electron paramagnetic resonance (EPR) spectra, and operating parameters were 140K, 9064 MHz, 0.998 mW, X-band. The soft-XAS measurements were carried out in total electron yield mode under ultra-high vacuum at beamline 4B9B of Beijing Synchrotron Radiation Facility of the Institute of High Energy Physics, Chinese Academy of Sciences. Au 4f<sub>7/2</sub> core level spectra were recorded for the photon energy calibration, and the energy resolution is better than 0.2 eV at room temperature. The electrochemical operando Cell (EC-RAIR-H) is supplied by Beijing Science Star technology Co. Ltd. The Raman spectrum was recorded on a HORIBA Raman microscope with a laser wavelength of 532 nm (LabRAM Aramis, HORIBA Jobin Yvon S.A.S, France) for surface characterization. Raman spectra of the sample (one spectrum per 30 s) were captured while a cyclic voltammetry test at a scan rate of 2 mV s<sup>-1</sup> simultaneously.

### **Electrochemical measurements**

Working electrode was prepared by traditional slurry-coating method. 80 wt% active material, 10 wt% acetylene black and 10 wt% polytetrafluoroethylene (PTFE) was mixed and coated onto carbon cloth with an area of 1 cm<sup>2</sup>. The electrode was then heated at 60 °C for 2 hours to evaporate the solvent and used as working electrode. The negative electrode was prepared by mixing active carbon, acetylene black and PTFE with a mass ratio of 8:1:1. Electrochemical measurements were conducted in a general three-electrode configuration in 1.0

M Na<sub>2</sub>SO<sub>4</sub> aqueous electrolyte with Ag/AgCl and a Pt foil as reference electrode and counter electrode, respectively. Cyclic voltammetry (CV) and galvanostatic charge discharge (GCD) experiments were performed to determine the electrochemical properties of the electrodes in a potential window of -0.1 to 0.9 V. All the operating current densities were calculated based on the mass of the active materials. Electrochemical impedance spectroscopy (EIS) measurements were carried out by applying an AC voltage with 5 mV amplitude in a frequency range from 0.01 Hz to 100 kHz at open potential.

The specific capacitance  $C$  (F g<sup>-1</sup>) was calculated based on the GCD curves according to equation <sup>1</sup> :

$$C = \frac{I \times \Delta t}{m \times V} \quad (S1)$$

where  $I$  (A) and  $\Delta t$  (s) are the discharge current and time, respectively,  $m$  (g) represents of the active material's loading mass and  $V$  refers to the charge/discharge potential window.

#### Sodium diffusion coefficient calculation

The diffusion coefficient of Na<sup>+</sup> ( $D_{Na^+}$ ) can be obtained from the low frequency line according to the equation <sup>2</sup>:

$$D_{Na^+} = 0.5(RT/AF^2C\sigma)^2 \quad (S2)$$

where  $R$ ,  $T$ ,  $F$ ,  $A$ , and  $C$  are the gas constant, the absolute temperature, the Faraday's constant, the apparent area of the electrode, and the molar concentration of Na<sup>+</sup>, respectively.  $\sigma$  is the Warburg factor following Equation:

$$Z' = R_e + R_{ct} + \sigma \omega^{-\frac{1}{2}} \quad (S3)$$

where  $R_e$  is the resistance between the electrolyte and electrode, and  $R_{ct}$  is the charge transfer resistance. Thus, the slopes of the plot of  $Z'$  vs  $\omega^{-1/2}$  can be used to obtain the values of  $\sigma$ .

#### Kinetic calculation

Capacitance contribution can be qualitatively analysed according to CV curve, as shown below <sup>3</sup>:

$$i = \alpha v^b \quad (S4)$$

where  $i$  and  $v$  are the current density and the potential scan rate, respectively,  $\alpha$  is a constant and  $b$  is a tunable parameter with a value of 0.5-1.0. When the value of  $b$  is close to 1.0, the reaction process is dominated by surface capacitance; when the value of  $b$  is close to 0.5, the reaction process is dominated by diffusion control.

The contribution of capacitance and diffusion limit to the total capacitance is further quantified <sup>4</sup>.

$$i(V) = k_1v + k_2v^{1/2} \quad (S5)$$

where  $k_1$  and  $k_2$  represent capacitive and diffusion contributions, respectively. By determining both  $k_1$  and  $k_2$ , it is thus possible to distinguish the fraction of the current arising from  $\text{Na}^+$  insertion and that from capacitive processes at specific potentials.

### Supercapacitor devices measurements

Supercapacitor Devices Measurements: Asymmetric supercapacitor (ASC) device was fabricated by employing Sn-MnO<sub>2</sub> and AC as cathode and anode, respectively. Two electrodes were separated by glassy fibrous separator in 1 M Na<sub>2</sub>SO<sub>4</sub> aqueous electrolyte. Cyclic voltammetry (CV) and galvanostatic charge/discharge (GCD) measurements were performed in a potential window of -0.1 to 0.9 V.

The energy density ( $E$ , Wh kg<sup>-1</sup>) of the ASC is calculated according to S6<sup>5</sup>:

$$E = \frac{C \times V^2}{2} \times \frac{1000}{3600} \quad (S6)$$

The power density ( $P$ , W kg<sup>-1</sup>) of the ASC is calculated according to S7<sup>6</sup>:

$$P = \frac{E \times 3600}{t} \quad (S7)$$

where  $t$  (s) is discharge time.

### DFT Methods

We have employed the Vienna Ab initio Simulation Package (VASP) to perform all density functional theory (DFT) calculations within spin-polarized frame. The elemental core and valence electrons were represented by the projector augmented wave (PAW) method and plane-wave basis functions with a cutoff energy of 520 eV. Generalized gradient approximation with the Perdew-Burke-Ernzerhof (GGA-PBE) exchange-correlation functional was employed in all the calculations. The DFT-D3 empirical correction method was employed to describe van der Waals interactions. Geometry optimizations were performed with the force convergency smaller than 0.07 eV/Å. Monkhorst-Pack k-points of 1×1×1 was applied for all the calculations. To overcome this shortcoming, the GGA+U approach was used with U-J = 3.9 eV for the Mn atoms.

Supporting figures

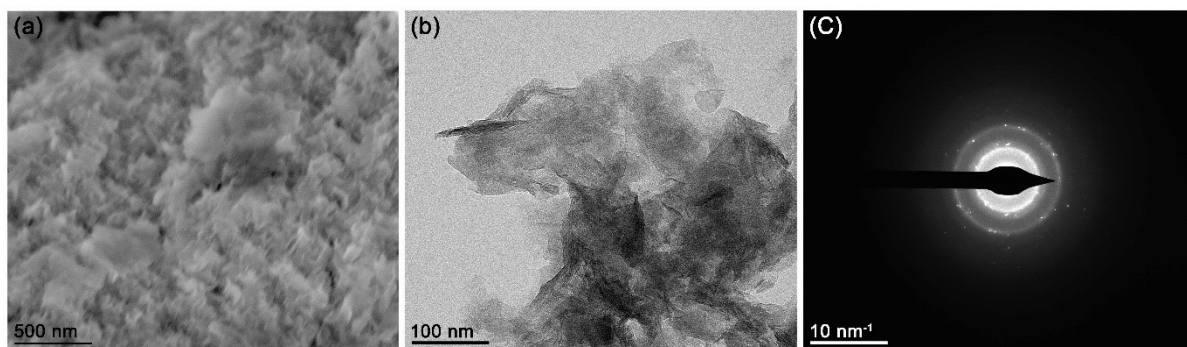

**Fig. S1** (a) SEM image and (b) TEM image of MnO<sub>2</sub>, (c) SAED image of MnO<sub>2</sub>.

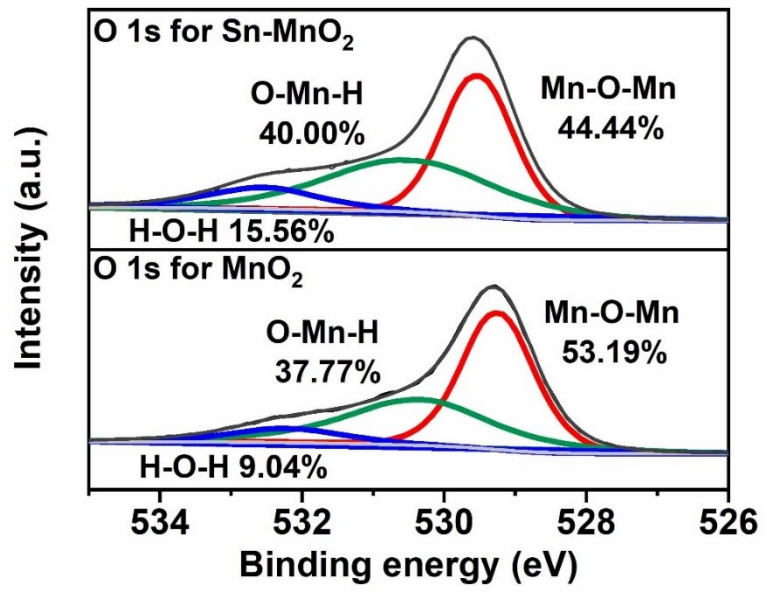

Fig. S2 XPS spectra: O 1s of Sn-MnO<sub>2</sub> and MnO<sub>2</sub>.

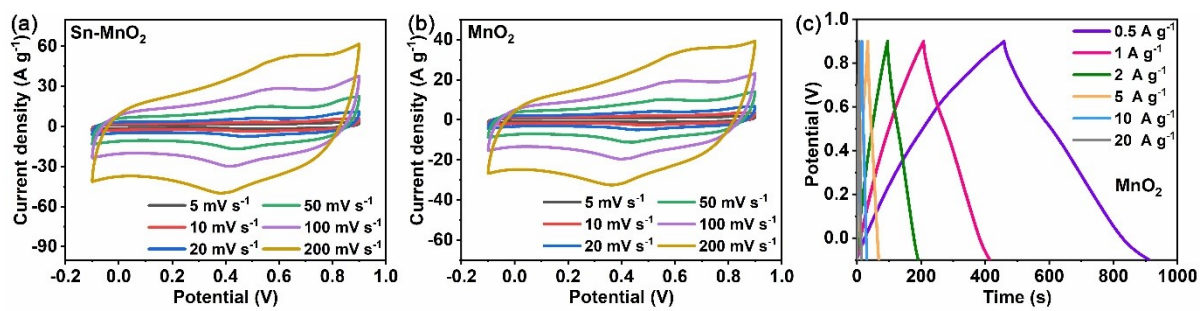

**Fig. S3** (a, b) CV curves of Sn-MnO<sub>2</sub> and MnO<sub>2</sub> samples at different scan rates from 5-200 mV s<sup>-1</sup>. (c) GCD curves at different current densities of MnO<sub>2</sub> sample.

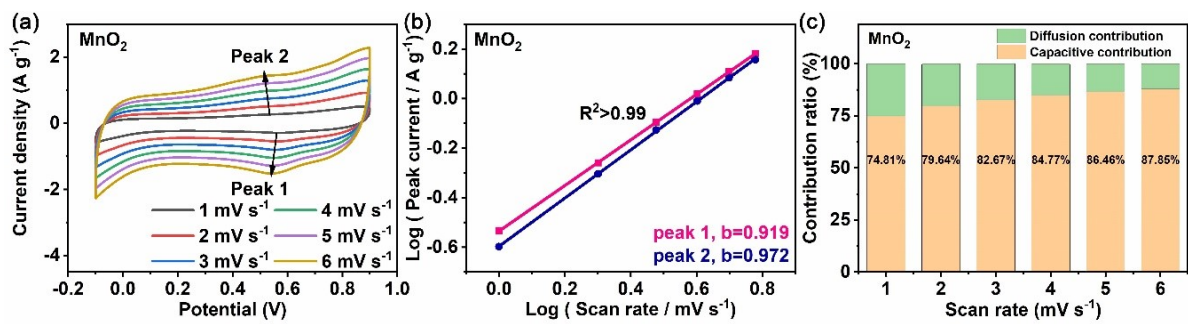

**Fig. S4** (a) CV curves of MnO<sub>2</sub> at different scan from 1-6 mV s<sup>-1</sup>. (b) The linear fitting curves of log (i) versus log (v) according to the CV results in (a). (c) Diffusion contributions and capacitive contributions of MnO<sub>2</sub>.



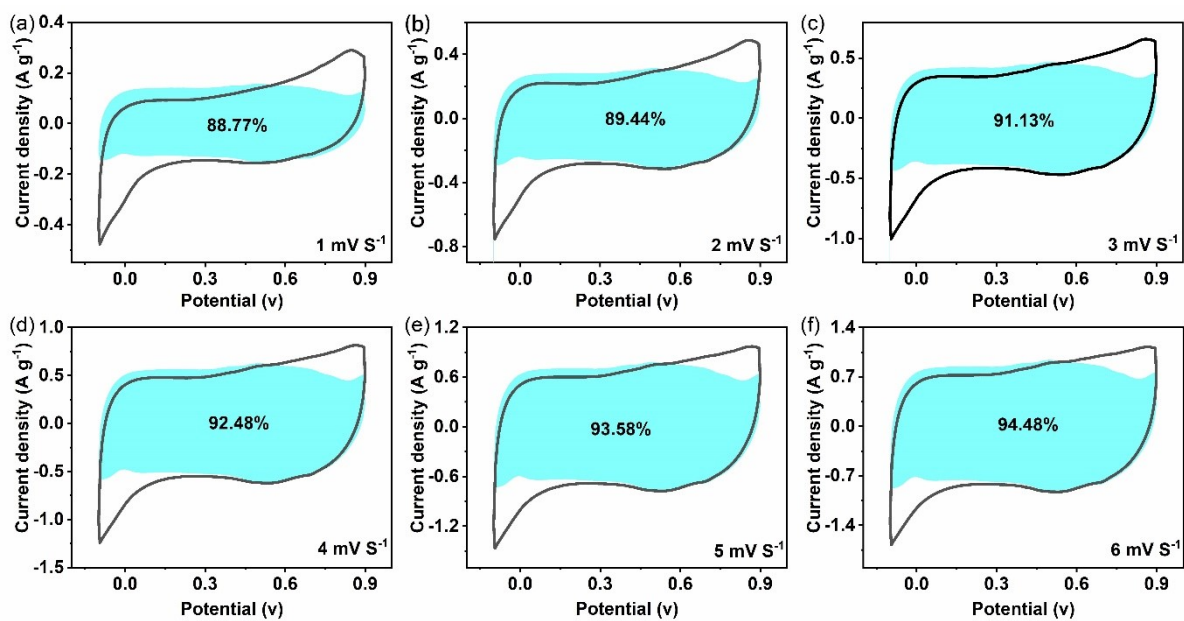

**Fig. S5** Pseudocapacitive fraction (shown by the shaded area) calculated at a scan rate of 1-6 mV s<sup>-1</sup> from CV curves at different scan rates of (a, b, c, d, e, f) Sn-MnO<sub>2</sub> electrode.

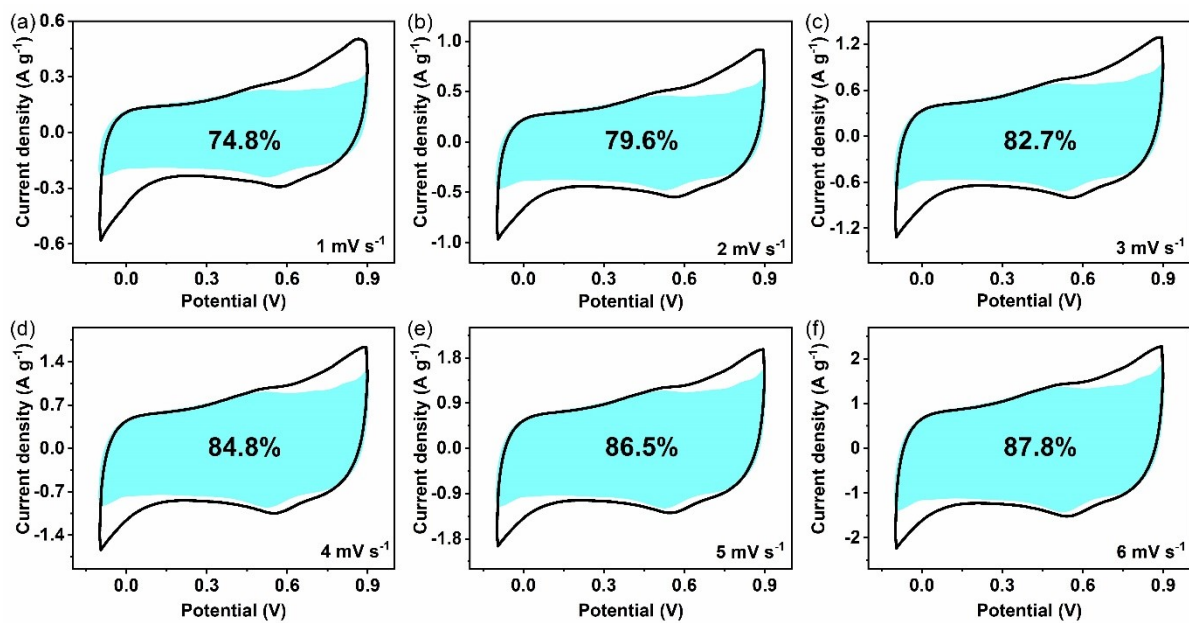

**Fig. S6** Pseudocapacitive fraction (shown by the shaded area) calculated at a scan rate of 1-6 mV s<sup>-1</sup> from CV curves at different scan rates of (a, b, c, d, e, f) MnO<sub>2</sub> electrode.

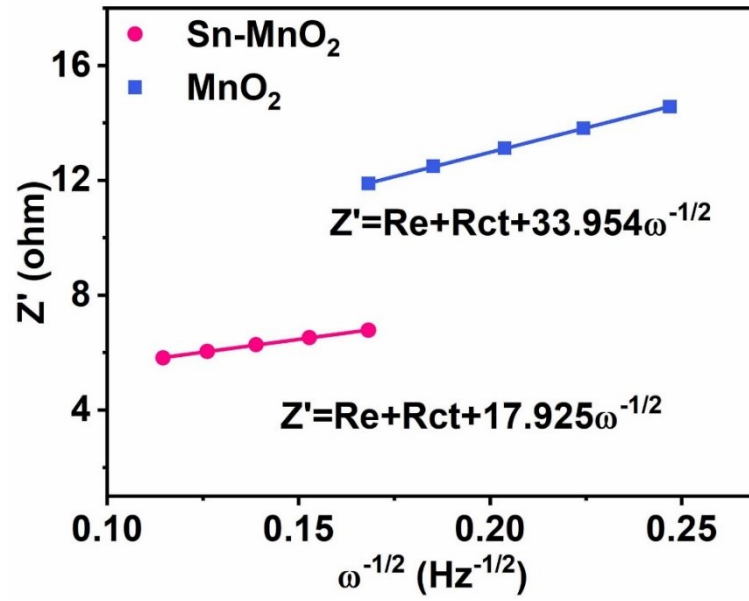

**Fig. S7** Diagram of  $Z'$  and  $\omega^{-1/2}$  in the low frequency zone obtained from EIS measurement and the calculated diffusion coefficient of Sn-MnO<sub>2</sub> and MnO<sub>2</sub>.

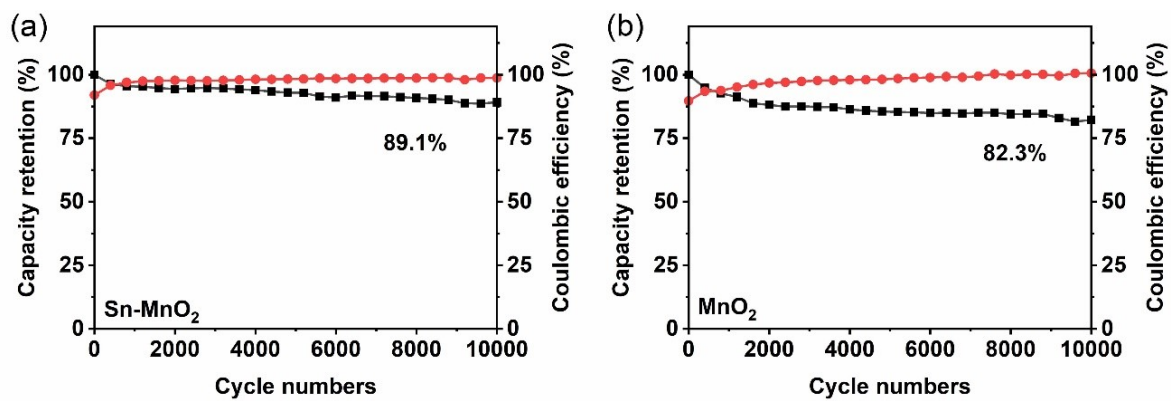

Fig. S8 (a, b) Cycling stability of Sn-MnO<sub>2</sub> electrode and MnO<sub>2</sub> electrode at a current density of 1 A g<sup>-1</sup>.

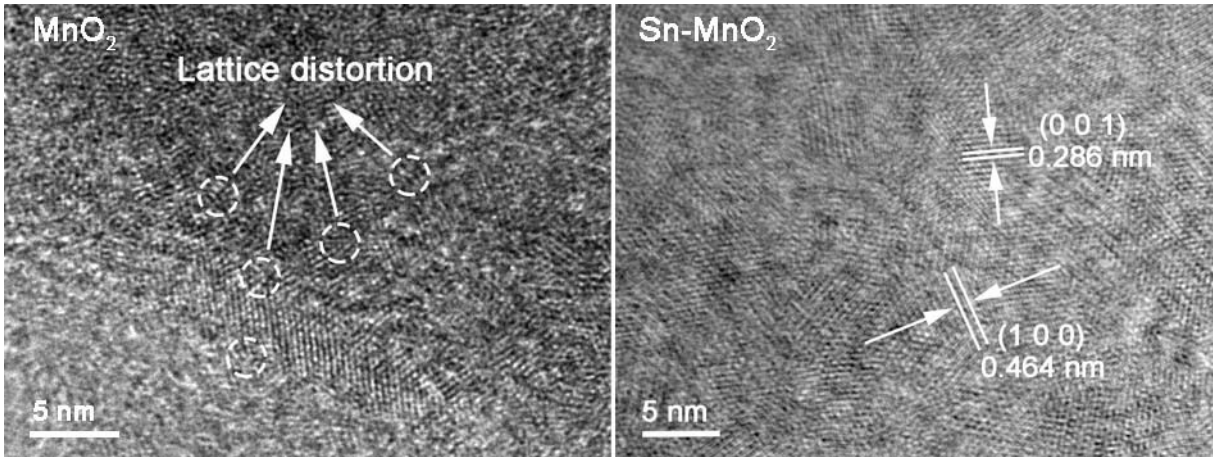

**Fig. S9.** HRTEM images of cycled  $\text{MnO}_2$  and  $\text{Sn-MnO}_2$  cathode materials.

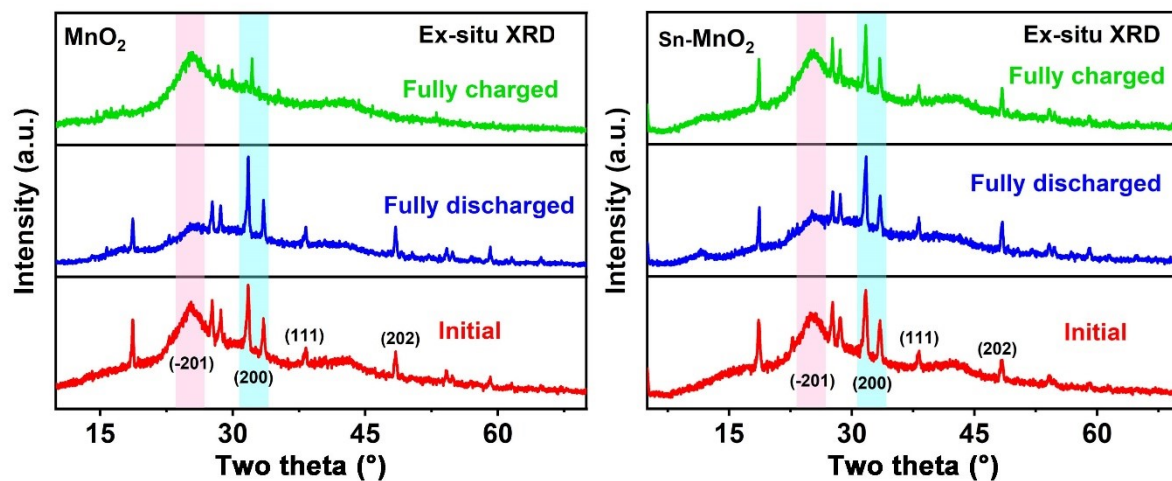

Fig. S10. Ex-situ XRD patterns of  $\text{MnO}_2$  and  $\text{Sn-MnO}_2$ .

Supercapacitor model

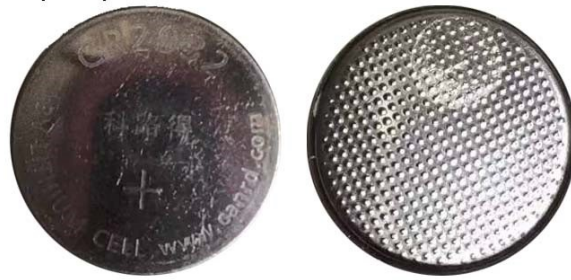

**Fig. S11.** The assembled prototype of the supercapacitor.

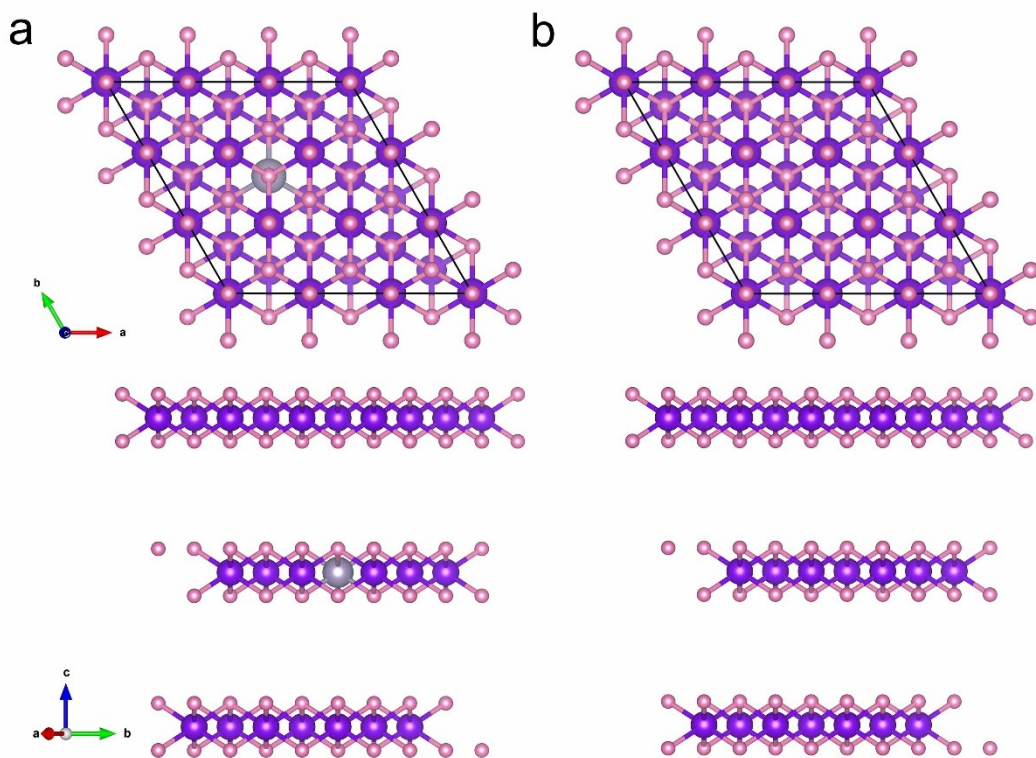

**Fig. S12** The top view (above) and side view (below) of optimized structure for (a) undoped Sn-MnO<sub>2</sub> and (b) MnO<sub>2</sub>. Color codes: Mn, purple; O, pink; Sn, grey, respectively.



## References

1. M. Jana, P. Samanta, N. C. Murmu and T. Kuila, *Chem. Eng. J.*, 2017, **330**, 914-925.
2. S. Wang, R. Zhao, S. Yao, B. Li, R. Liu, L. Hu, A. Zhang, R. Yang, X. Liu, Z. Fu, D. Wang, Z. Yang and Y.-M. Yan, *Journal of Materials Chemistry A*, 2021, **9**, 23506-23514.
3. S. Wang, L. Li, Y. Shao, L. Zhang, Y. Li, Y. Wu and X. Hao, *Adv Mater*, 2019, **31**, e1806088.
4. C. Zhao, C. Yu, M. Zhang, H. Huang, S. Li, X. Han, Z. Liu, J. Yang, W. Xiao, J. Liang, X. Sun and J. Qiu, *Adv. Energy Mater.*, 2017, **7**, 1602880.
5. A. Zhang, R. Gao, L. Hu, X. Zang, R. Yang, S. Wang, S. Yao, Z. Yang, H. Hao and Y.-M. Yan, *Chemical Engineering Journal*, 2021, **417**.
6. Y. Bai, B. Shen, S. Zhang, Z. Zhu, S. Sun, J. Gao, B. Li, Y. Wang, R. Zhang and F. Wei, *Adv. Mater.*, 2019, **31**, 1800680.
